# Supplementary material for: Detection of single nucleotide and copy number variants in the Fabry disease-associated GLA gene using nanopore sequencing
Source: PubMed Central journal article supplement (PMC8595663; doi:10.1038/s41598-021-01749-7), 2021-11-16
Supplement: 41598_2021_1749_MOESM1_ESM.pdf [file 41598_2021_1749_MOESM1_ESM.pdf]

# Table S1. Sequencing yield statistics

| Sample ID | # reads | Sequenced bases | Average coverage |
|-----------|---------|-----------------|------------------|
| 1         | 98,414  | 599,578,149     | 46,121           |
| 2         | 111,133 | 747,343,155     | 57,488           |
| 3         | 92,086  | 718,674,099     | 55,283           |
| 4         | 87,886  | 611,067,870     | 47,005           |
| 5         | 89,735  | 624,263,351     | 48,020           |
| 6         | 94,217  | 693,470,377     | 53,344           |
| 7         | 28,401  | 234,055,419     | 18,004           |
| 8         | 73,558  | 569,418,984     | 43,801           |
| 9         | 84,108  | 673,662,374     | 51,820           |
| 10        | 68,398  | 578,245,901     | 44,480           |
| 11        | 99,696  | 743,875,845     | 57,221           |
| 12        | 78,478  | 610,947,177     | 46,996           |
| Median    | 88,811  | 617,665,611     | 47,513           |

# Fig. S1

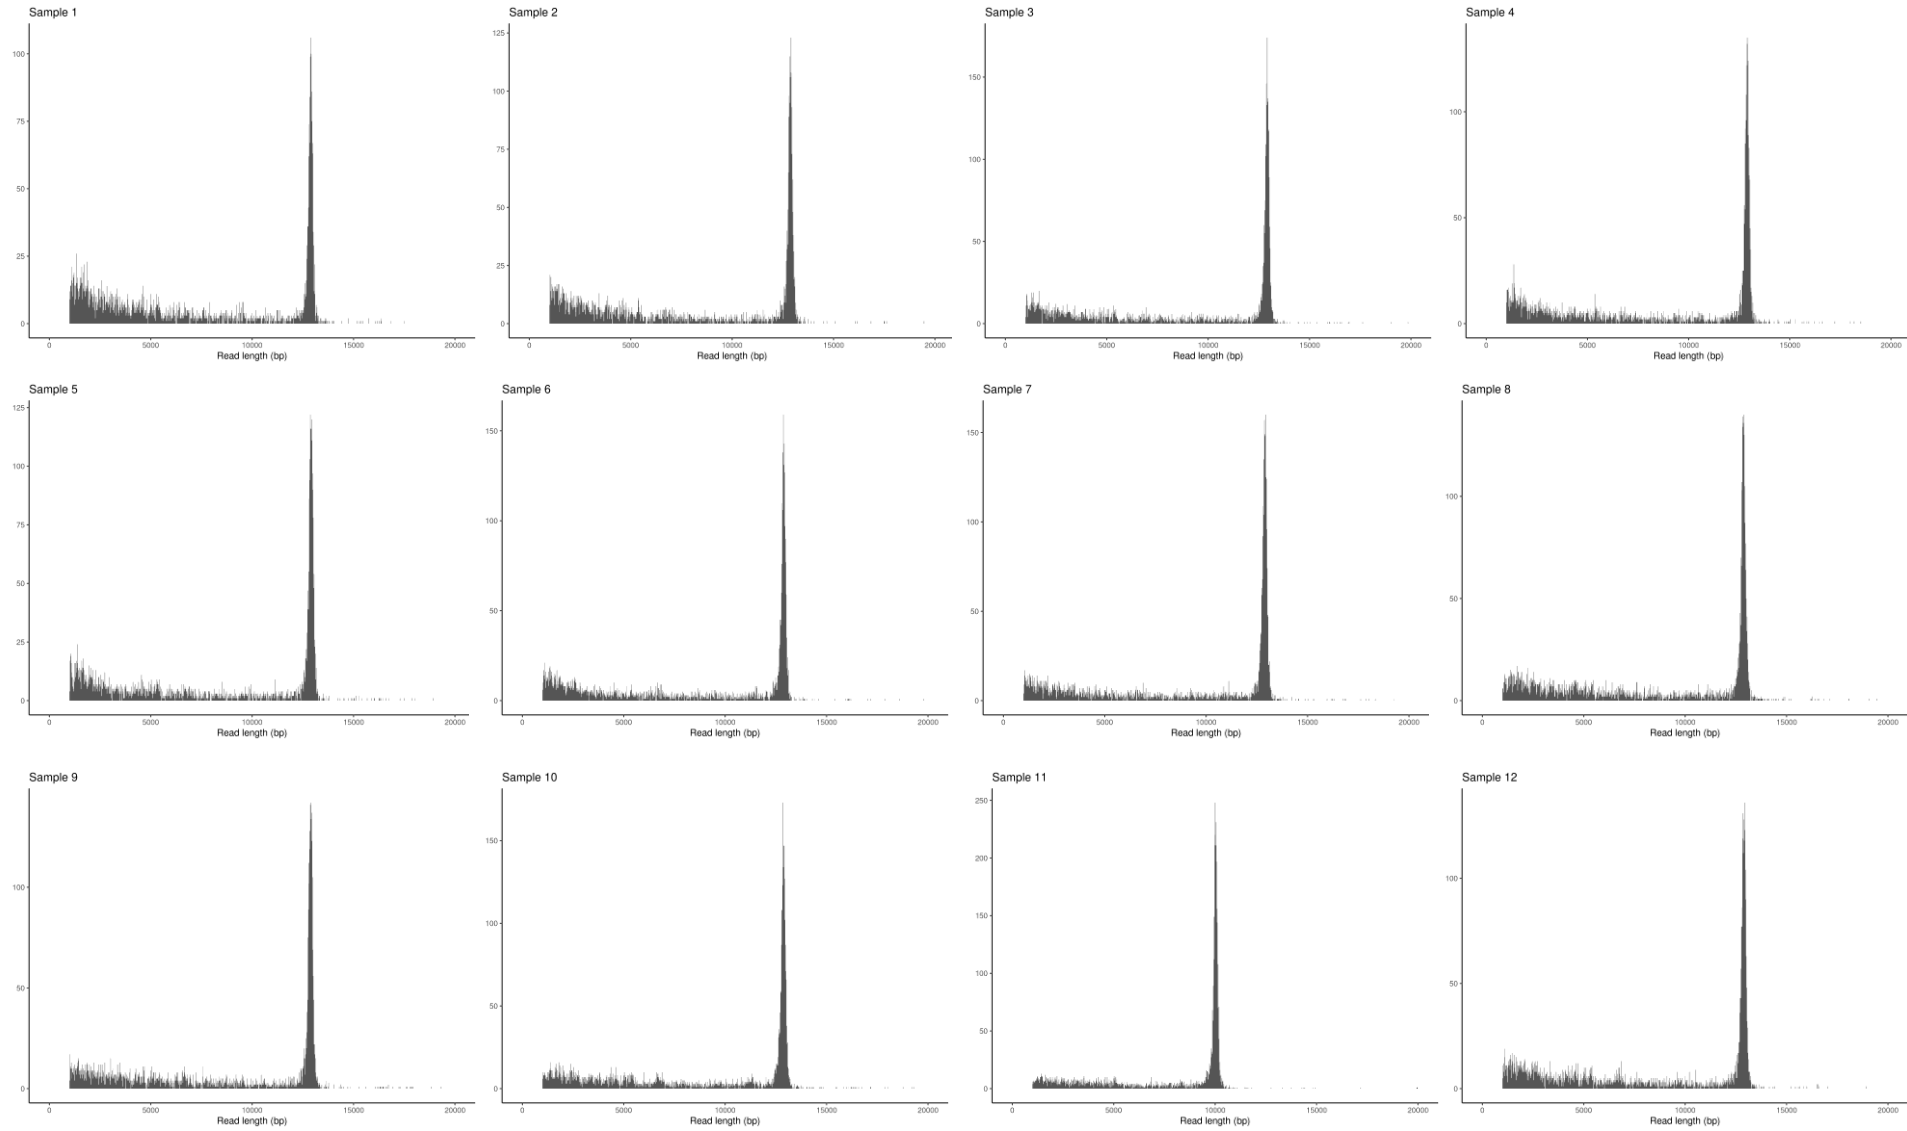

Fig S1. size distribution of 5000 randomly subsampled ONT reads from each sample, showing a peak at 13 kb, the full PCR product length. In sample 11 which posses a 2.9 kb deletion, the peak is at 10 kb.

# Fig S2

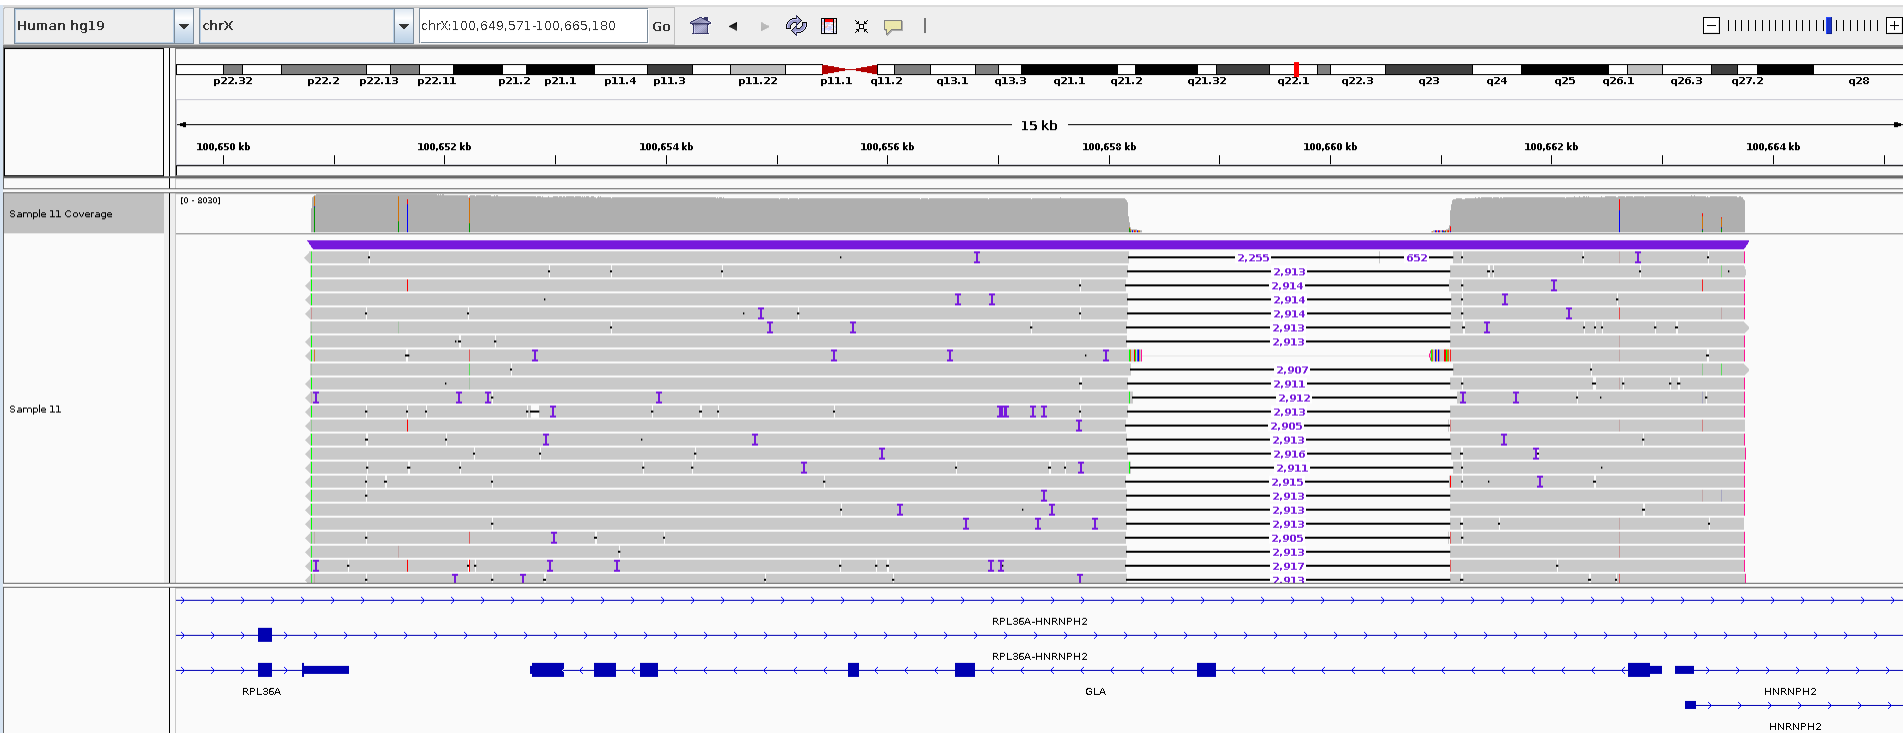

Fig S2. IGV snapshot showing the 2914 bp deletion in sample 11.
